# Supplementary material for: Synthesis and structure of the extended phosphazane ligand [(1,4-C6H4){N(μ-PNtBu)2NtBu}2]4−
Source: Royal Society of Chemistry journal article supplement (doi:10.1039/c5dt04393j), 2015-12-03
Supplement: c5dt04393j1.pdf [file c5dt04393j1.pdf]

## Supporting Information

### **Synthesis and structure of the extended phosphazane ligand [(1,4-C<sub>6</sub>H<sub>4</sub>){N(μ-PNtBu)<sub>2</sub>NtBu}<sub>2</sub>]<sup>4-</sup>**

Raquel Sevilla,<sup>a</sup> Robert J. Less<sup>a</sup>, Raúl García-Rodríguez<sup>a</sup>, Andrew D. Bond<sup>a</sup> and Dominic S. Wright<sup>a</sup>

*Department of Chemistry, University of Cambridge, Lensfield Rd, Cambridge CB2 1EW, UK.*

**Figure S1.**  $^{31}\text{P}$  NMR (298 K,  $\text{C}_6\text{D}_6$ , 161.97 MHz) spectrum of  $(1,4\text{-C}_6\text{H}_4)[\text{N}(\mu\text{-PNH}^t\text{Bu})_2\text{N}^t\text{Bu}]_2$  (**1H<sub>4</sub>**).

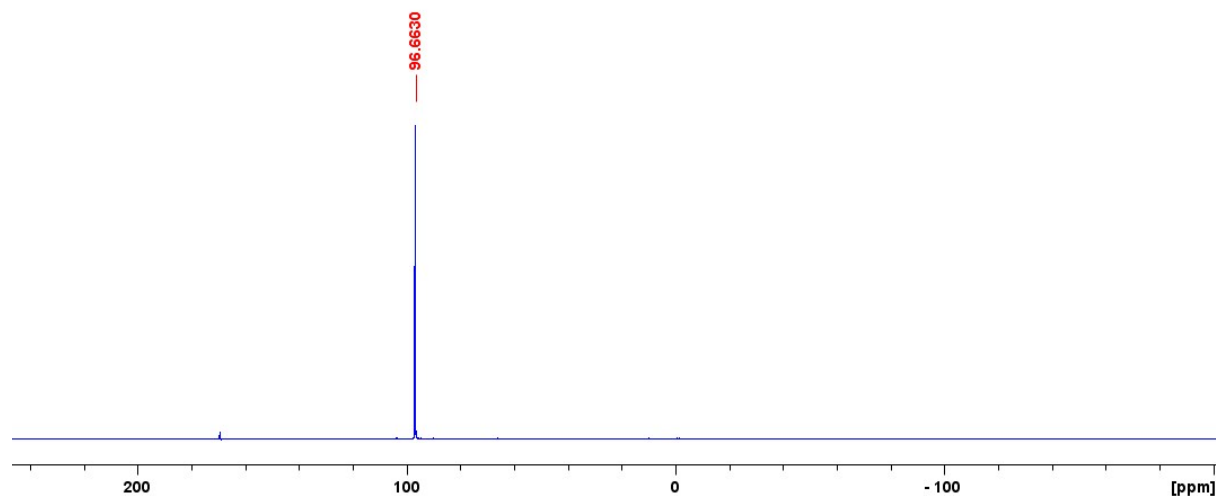

**Figure S2.**  $^1\text{H}$  NMR (298 K,  $\text{C}_6\text{D}_6$ , 400 MHz) spectrum of  $(1,4\text{-C}_6\text{H}_4)[\text{N}(\mu\text{-PNH}^t\text{Bu})_2\text{N}^t\text{Bu}]_2$  (**1H<sub>4</sub>**); (\*)residual benzene- $\text{d}_6$ , (\*\*) silicone grease.

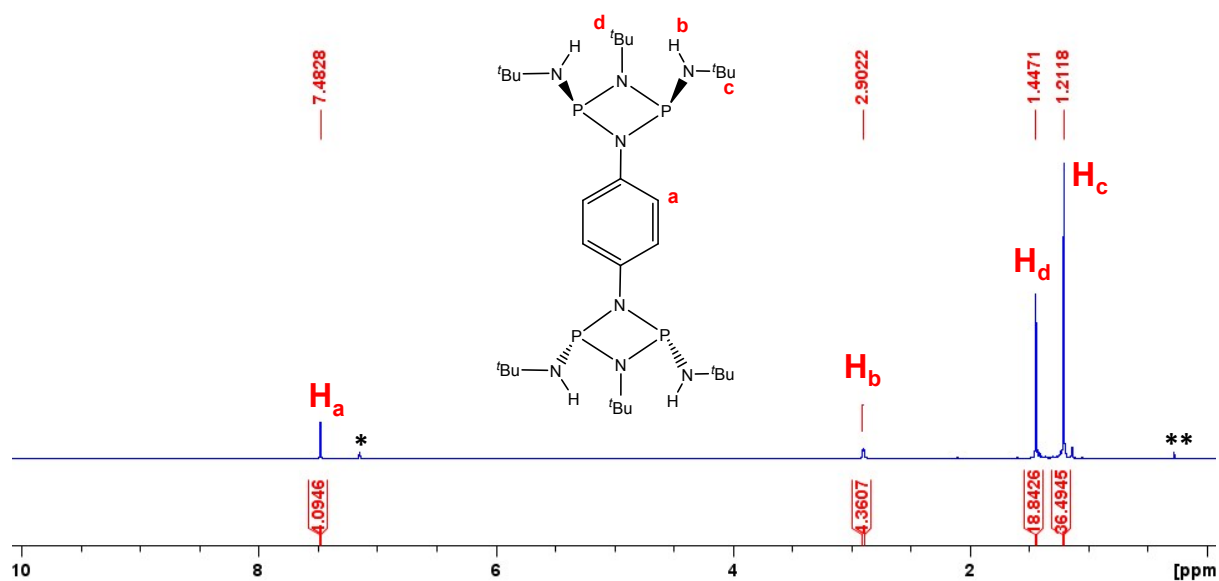

**Figure S3.**  $^{13}\text{C}\{^1\text{H}\}$  NMR (298 K,  $\text{C}_6\text{D}_6$ , 100.62 MHz) spectrum of  $(1,4\text{-C}_6\text{H}_4)[\text{N}(\mu\text{-PNH}^t\text{Bu})_2\text{N}^t\text{Bu}]_2$  (**1H<sub>4</sub>**); (\*)residual benzene-d<sub>6</sub>, (\*\*) silicone grease.

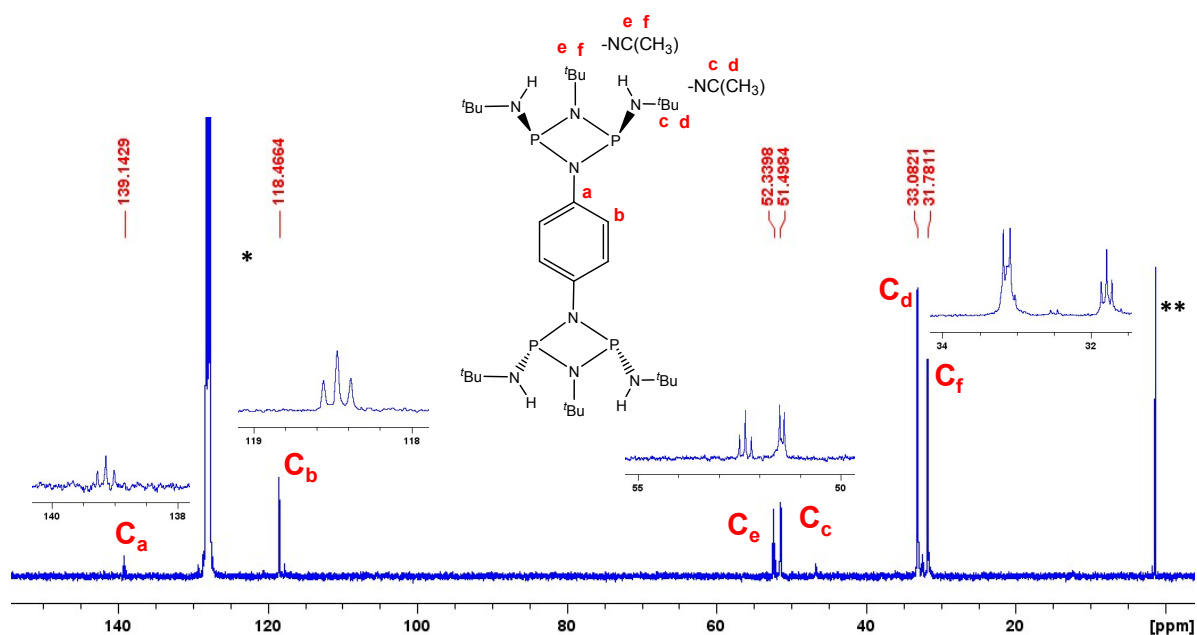

**Figure S4.**  $^{31}\text{P}$  NMR (298 K,  $\text{THF-d}_8$ , 202.48 MHz) spectrum of  $(1,4\text{-C}_6\text{H}_4)[\text{N}(\mu\text{-}(\text{PN}^t\text{Bu})_2\text{Mg}\cdot(\text{THF})_2)\text{N}^t\text{Bu}]_2$  [**1**{Mg $\cdot$ (THF)<sub>2</sub>}<sub>2</sub>].

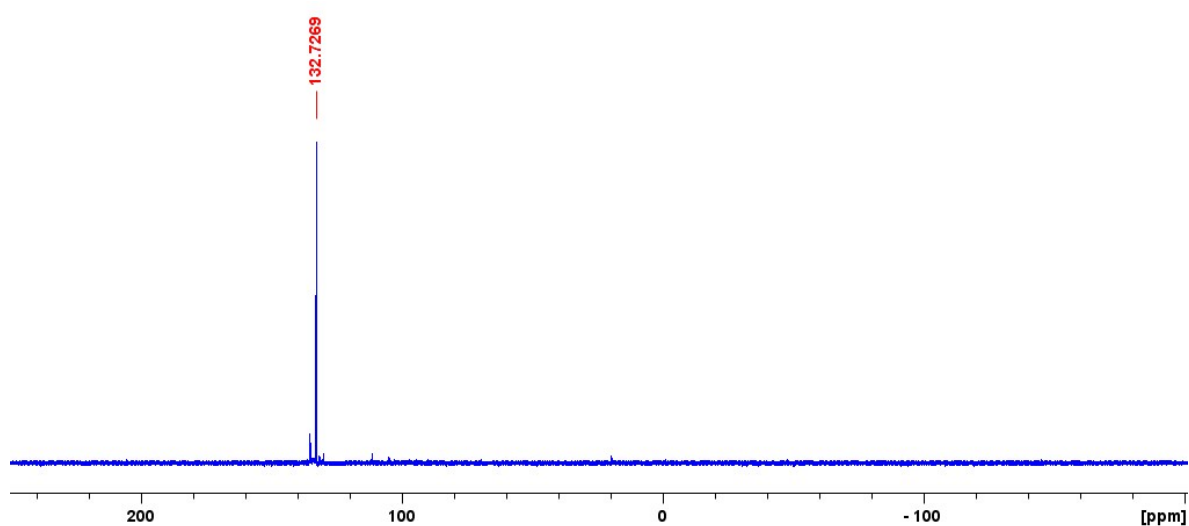

**Figure S5.**  $^1\text{H}$  NMR (298 K,  $d_8$ -THF, 500 MHz) spectrum of  $(1,4\text{-C}_6\text{H}_4)[\text{N}(\mu\text{-(PN}^t\text{Bu)}_2\text{Mg}\cdot(\text{THF})_2)\text{N}^t\text{Bu}]_2$  [ $\mathbf{1}\{\text{Mg}\cdot(\text{THF})_2\}_2$ ]; (\*)residual  $d_8$ -THF, (\*\*) silicone grease. Note: a small amount of H-grease and heptane (from the  $\text{Bu}_2\text{Mg}$  solution) was also present ( $\delta$  0.85-0.92).

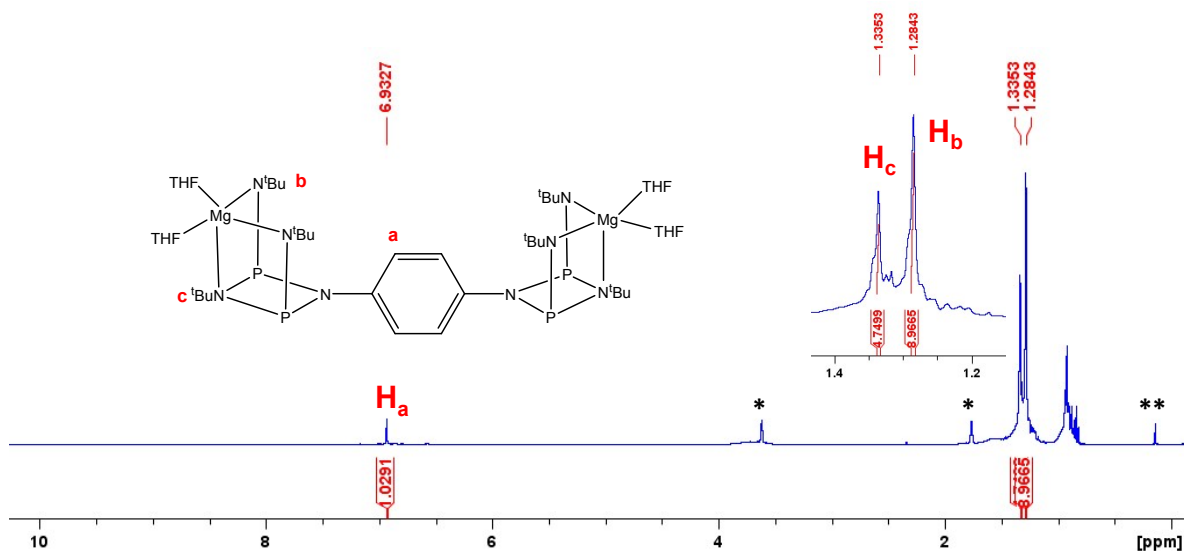

**Figure S6.**  $^1\text{H}$ - $^{31}\text{P}$  HMBC (298 K,  $d_8$ -THF, 500 MHz) spectrum of  $(1,4\text{-C}_6\text{H}_4)[\text{N}(\mu\text{-(PN}^t\text{Bu)}_2\text{Mg}\cdot(\text{THF})_2)\text{N}^t\text{Bu}]_2$  [ $\mathbf{1}\{\text{Mg}\cdot(\text{THF})_2\}_2$ ].

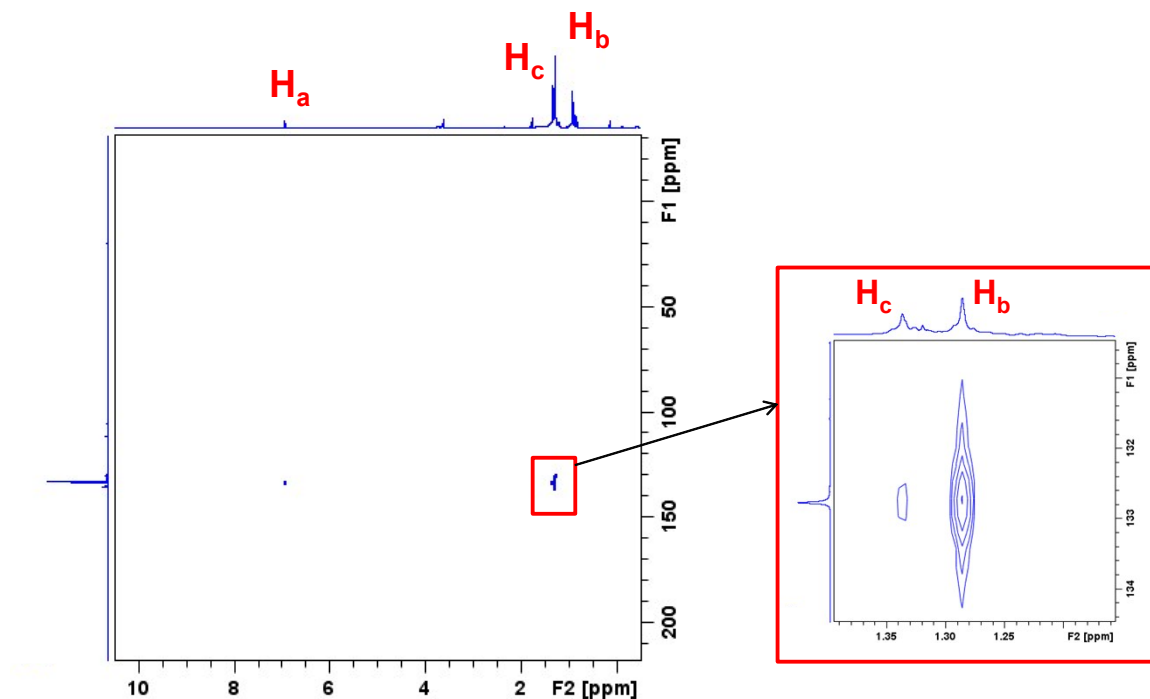

**Figure S7.**  $^1\text{H}$ - $^1\text{H}$  NOESY (298 K,  $d_8$ -THF, 500 MHz, mixing time 600 ms) spectrum of  $(1,4\text{-C}_6\text{H}_4)[\text{N}(\mu\text{-PN}^t\text{Bu})_2\text{Mg}\cdot(\text{THF})_2\text{N}^t\text{Bu}]_2$  [ $\mathbf{1}\{\text{Mg}\cdot(\text{THF})_2\}_2$ ] showing the crosspeak between  $\text{H}^b$  and the protons of the aromatic ring arising from intramolecular cross-relaxation of protons that are close to each other in space.

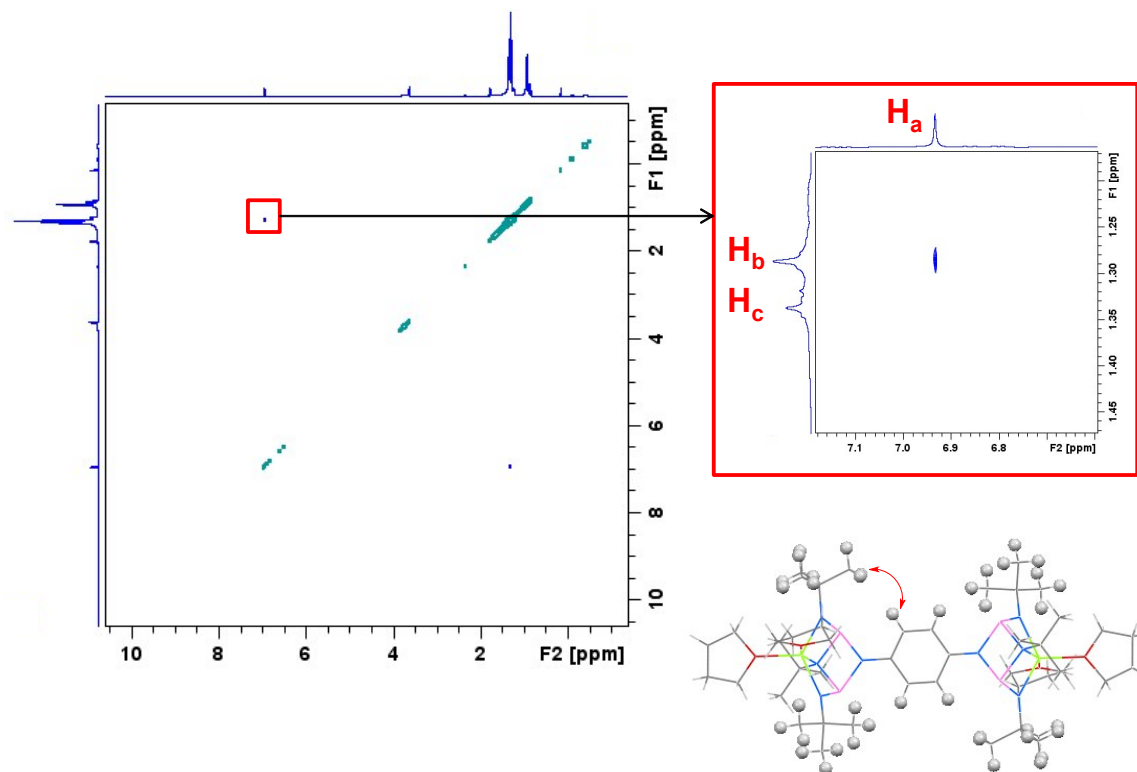

**Figure S8.** (Bottom, blue)  $^1\text{H}$  NMR (298 K,  $d_8$ -THF, 500 MHz) spectrum of  $(1,4\text{-C}_6\text{H}_4)[\text{N}(\mu\text{-PNH}^t\text{Bu})_2\text{N}^t\text{Bu}]_2$  ( $\mathbf{1H}_4$ ); (top, red)  $^1\text{H}$  NMR (298 K,  $d_8$ -THF, 500 MHz) spectrum of  $(1,4\text{-C}_6\text{H}_4)[\text{N}(\mu\text{-PN}^t\text{Bu})_2\text{Mg}\cdot(\text{THF})_2\text{N}^t\text{Bu}]_2$  [ $\mathbf{1}\{\text{Mg}\cdot(\text{THF})_2\}_2$ ]. Complete deprotonation is observed (disappearance of signal corresponding to the  $\text{NH}$  protons at 3.91).

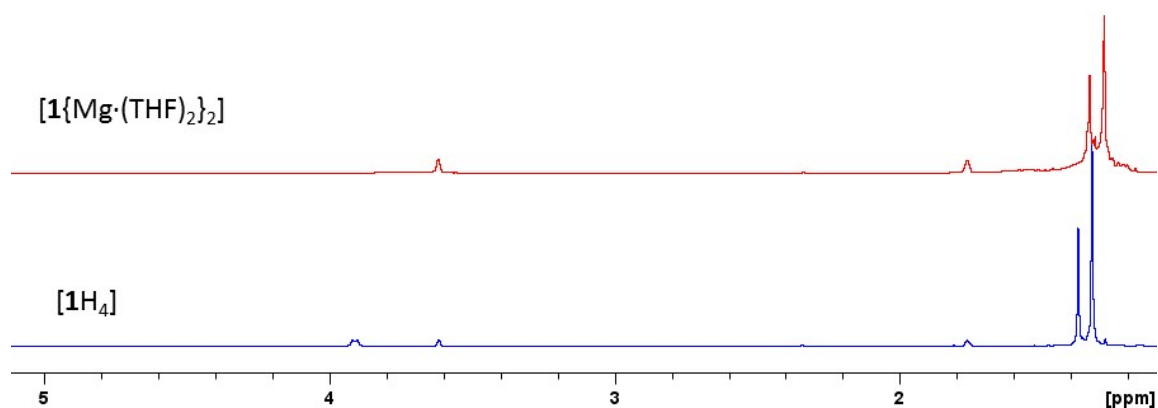

**Figure S9.**  $^{13}\text{C}\{^1\text{H}\}$  NMR (298 K, d<sub>8</sub>-THF, 100.62 MHz) spectrum of (1,4- $\text{C}_6\text{H}_4$ )[N( $\mu$ -(PN<sup>*t*</sup>Bu)<sub>2</sub>Mg·(THF)<sub>2</sub>)N<sup>*t*</sup>Bu]<sub>2</sub> [**1**{Mg·(THF)<sub>2</sub>}]<sub>2</sub>. Although the quaternary carbon C<sup>b</sup> is easily observed through  $^1\text{H}$ - $^{13}\text{C}$  HMBC experiment (see insert), its direct observation in the  $^{13}\text{C}\{^1\text{H}\}$  spectrum was challenging. Note: resonances at 67.21 and 25.10 arise from d<sub>8</sub>-THF. Note 2: resonance for H-grease and heptane present (observed in the  $^1\text{H}$  NMR as well).

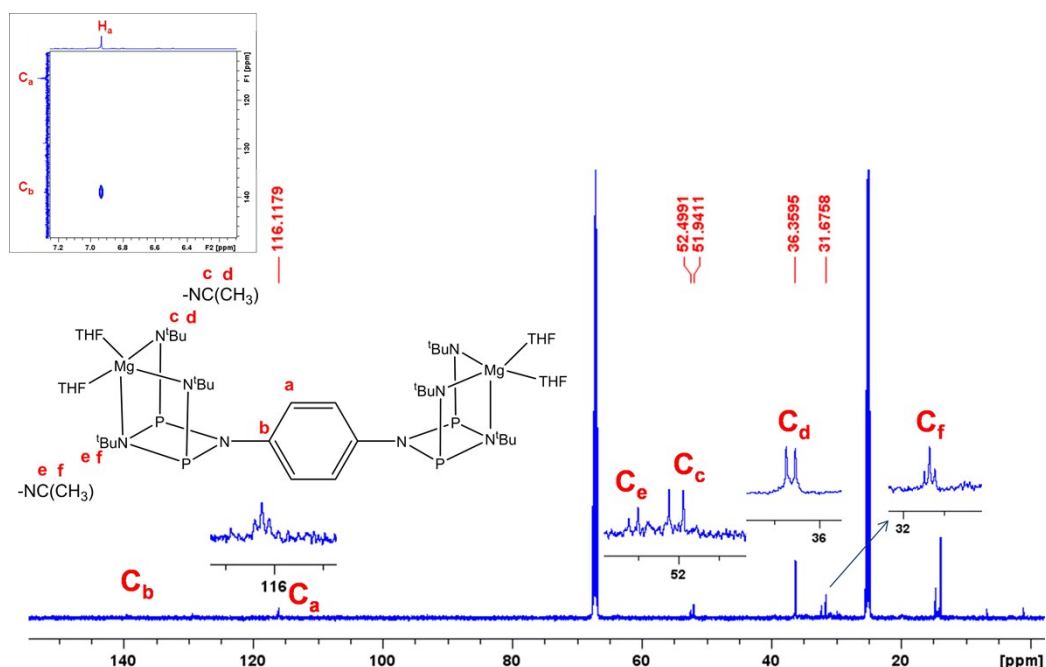

**Figure S10.**  $^1\text{H}$ - $^{13}\text{C}$  HMQC (298 K, d<sub>8</sub>-THF, 500 MHz) spectrum of (1,4- $\text{C}_6\text{H}_4$ )[N( $\mu$ -(PN<sup>*t*</sup>Bu)<sub>2</sub>Mg·(THF)<sub>2</sub>)N<sup>*t*</sup>Bu]<sub>2</sub> [**1**{Mg·(THF)<sub>2</sub>}]<sub>2</sub>.

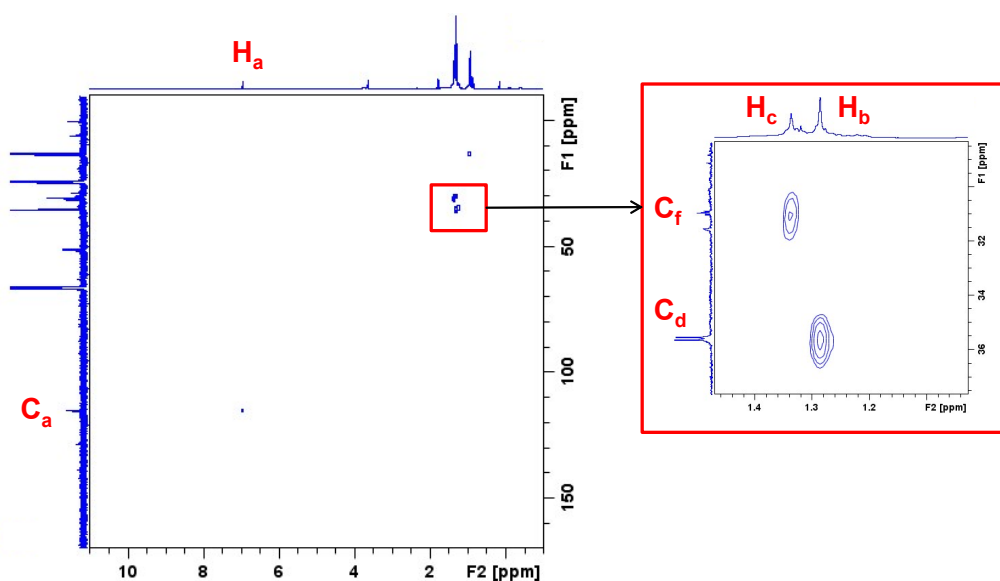

Elemental analysis found for the solid isolated upon removal of the reaction solvent of [**1**{Mg·(THF)<sub>2</sub>}]<sub>2</sub>: C, 39.19; H, 7.86; N 2.76; P 6.87. Anal. Calcd for [**1**{Mg·(THF)<sub>2</sub>}]<sub>2</sub> C, 55.94; H, 8.78; N 11.34; P 12.54. Anal. Calcd for **1**Mg<sub>2</sub> (THF-desolvation) C, 51.23; H, 8.31; N 15.93; P 17.61.

**Figure S11.** *In situ*  $^{31}\text{P}$  NMR (298 K,  $\text{CDCl}_3$  capillary, 161.97 MHz) spectrum from reaction of  $1\text{H}_4$  with 2,6-diisopropylaniline.

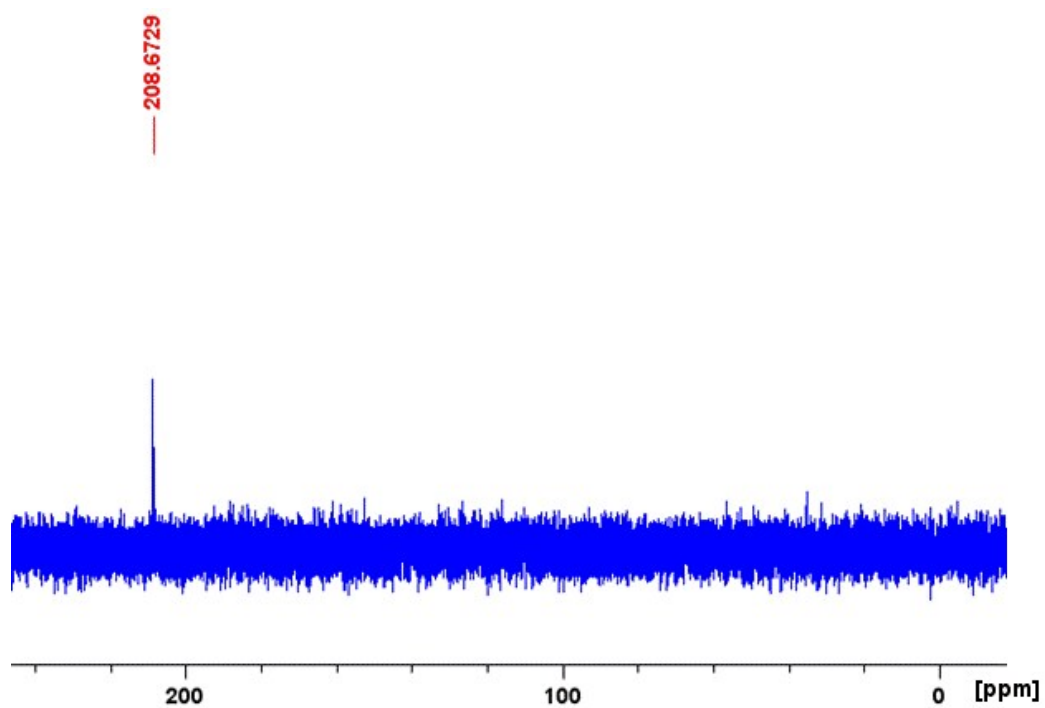

## X-ray Crystallographic Studies

**Table S1.** Crystal, measurement and refinement data for the compounds studied by X-ray diffraction.

|                                                                                        | <b>1H<sub>4</sub><sup>a</sup></b>                             | <b>1H<sub>4</sub>·cyclohexane<sup>b</sup></b>                                                     | <b>1{Mg·(THF)<sub>2</sub>}<sub>2</sub></b>                                                   |
|----------------------------------------------------------------------------------------|---------------------------------------------------------------|---------------------------------------------------------------------------------------------------|----------------------------------------------------------------------------------------------|
| CCDC number                                                                            | 1435095                                                       | 1435096                                                                                           | 1435098                                                                                      |
| Chemical formula                                                                       | C <sub>30</sub> H <sub>62</sub> N <sub>8</sub> P <sub>4</sub> | C <sub>30</sub> H <sub>62</sub> N <sub>8</sub> P <sub>4</sub> ·2(C <sub>6</sub> H <sub>12</sub> ) | C <sub>46</sub> H <sub>90</sub> Mg <sub>2</sub> N <sub>8</sub> O <sub>4</sub> P <sub>4</sub> |
| Formula mass                                                                           | 658.8                                                         | 827.1                                                                                             | 991.8                                                                                        |
| Crystal system                                                                         | triclinic                                                     |                                                                                                   | monoclinic                                                                                   |
| <i>a</i> /Å                                                                            | 6.0734(9)                                                     | 6.1188(3)                                                                                         | 10.4939(4)                                                                                   |
| <i>b</i> /Å                                                                            | 12.3908(14)                                                   | 14.0514(6)                                                                                        | 17.4459(6)                                                                                   |
| <i>c</i> /Å                                                                            | 14.032(2)                                                     | 15.4022(7)                                                                                        | 16.1229(7)                                                                                   |
| $\alpha$ /°                                                                            | 106.920(4)                                                    | 88.944(3)                                                                                         | 90                                                                                           |
| $\beta$ /°                                                                             | 98.179(6)                                                     | 89.034(3)                                                                                         | 96.9488(16)                                                                                  |
| $\gamma$ /°                                                                            | 100.308(10)                                                   | 81.094(2)                                                                                         | 90                                                                                           |
| Unit cell volume/Å <sup>3</sup>                                                        | 972.5(2)                                                      | 1307.9(1)                                                                                         | 2930.0(2)                                                                                    |
| Temperature/K                                                                          | 180(2)                                                        | 220(2)                                                                                            | 180(2)                                                                                       |
| Space group                                                                            | P-1                                                           | P-1                                                                                               | P2 <sub>1</sub> /n                                                                           |
| Z                                                                                      | 1                                                             | 1                                                                                                 | 2                                                                                            |
| Radiation type                                                                         | MoK $\alpha$                                                  | CuK $\alpha$                                                                                      | MoK $\alpha$                                                                                 |
| Absorption coefficient, $\mu$ /mm <sup>-1</sup>                                        | 0.224                                                         | 1.585                                                                                             | 0.194                                                                                        |
| No. of reflections measured                                                            | 4947                                                          | 14919                                                                                             | 17185                                                                                        |
| No. of independent reflections                                                         | 2396                                                          | 4576                                                                                              | 5034                                                                                         |
| <i>R</i> <sub>int</sub>                                                                | 0.054                                                         | 0.063                                                                                             | 0.056                                                                                        |
| Final <i>R</i> 1 values ( <i>I</i> > 2 $\sigma$ ( <i>I</i> ))                          | 0.083                                                         | 0.099                                                                                             | 0.068                                                                                        |
| Final <i>wR</i> ( <i>F</i> <sup>2</sup> ) values ( <i>I</i> > 2 $\sigma$ ( <i>I</i> )) | 0.188                                                         | 0.281                                                                                             | 0.143                                                                                        |
| Final <i>R</i> 1 values (all data)                                                     | 0.096                                                         | 0.140                                                                                             | 0.101                                                                                        |
| Final <i>wR</i> ( <i>F</i> <sup>2</sup> ) values (all data)                            | 0.194                                                         | 0.320                                                                                             | 0.160                                                                                        |
| Goodness of fit on <i>F</i> <sup>2</sup>                                               | 1.28                                                          | 1.06                                                                                              | 1.07                                                                                         |

<sup>a</sup> Refined as a non-merohedral twin.

<sup>b</sup> The version of this structure with SQUEEZE applied is deposited as CCDC-1435097.

Data were collected for **1H<sub>4</sub>** and **1{Mg·(THF)<sub>2</sub>}<sub>2</sub>** at 180(2) K on a Nonius KappaCCD diffractometer, using graphite-monochromated MoK $\alpha$  radiation ( $\lambda$  = 0.7107 Å). Data for **1H<sub>4</sub>·cyclohexane** were collected at 220(2) K on a Bruker D8-QUEST diffractometer using an Incoatec I $\mu$ S Cu microsource ( $\lambda$  = 1.5418 Å). Structures were solved using SHELXT (Sheldrick, 2015) and refined using SHELXL-2014 (Sheldrick, 2015). Data for **1H<sub>4</sub>** were identified to be subject to non-merohedral twinning corresponding to a 2-fold rotation around the *a* axis using the TWINROTMAT procedure in PLATON (Spek, 2009). The structure was refined using an HKLF-5 file generated by TWINROTMAT. The structure of **1H<sub>4</sub>·cyclohexane** contains cyclohexane molecules that exhibit rotational disorder. Modelling of these as two molecular components with restrained geometries, a refined site occupancy factor constrained to sum to unity for the two components, and a common isotropic displacement parameter produced the result indicated in Table S1. Confirmation that the relatively high *R*-factors stem from inadequate modelling of the solvent molecules was provided by application



of the SQUEEZE procedure (Spek, 2015), which produces  $R1 = 0.071$ ,  $wR2 = 0.214$ . The procedure indicates masking of 84 electrons per void, corresponding to one cyclohexane molecule (with two voids per unit cell). The CIF after application of SQUEEZE is provided. For **1H<sub>4</sub>**, the H atoms of the NH groups were refined with isotropic displacement parameters and with the N–H bond length restrained to be 0.88(1) Å. For **1H<sub>4</sub>·cyclohexane**, the corresponding atoms were placed geometrically with N–H = 0.87 Å and  $U_{\text{iso}}(\text{H}) = 1.2U_{\text{iso}}(\text{N})$ . The structures of **1H<sub>4</sub>** and **1H<sub>4</sub>·cyclohexane** contain essentially identical 2-dimensional sections (parallel to the *ac* planes in **1H<sub>4</sub>** and *ab* planes in **1H<sub>4</sub>·cyclohexane**; compare the unit-cell parameters in Table S1). Thus, the structure of **1H<sub>4</sub>·cyclohexane** is derived from that of **1H<sub>4</sub>** by insertion of the cyclohexane solvent molecules.

Overlay of the structures of **1H<sub>4</sub>** (red) and **1H<sub>4</sub>·cyclohexane** (blue) showing the consistent 2-D sections (horizontal). The upper layer in the diagram is overlaid exactly. The cyclohexane molecules are omitted from **1H<sub>4</sub>·cyclohexane**.

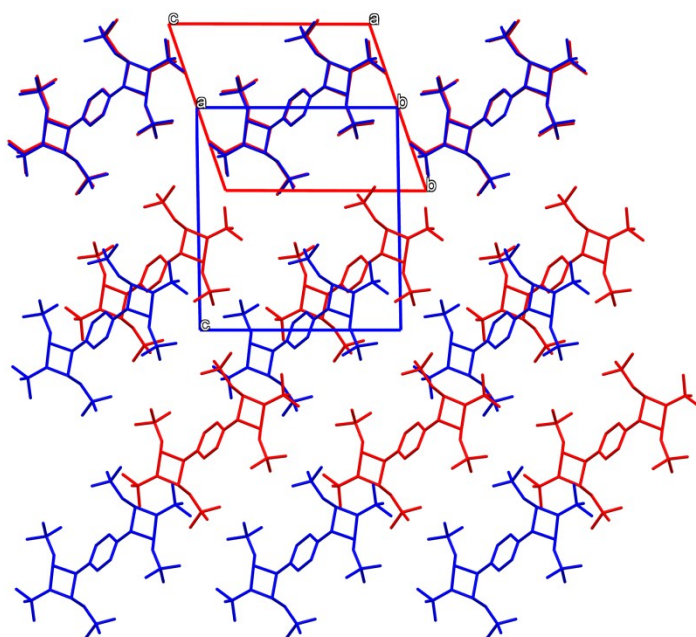

|          |                                                      |
|----------|------------------------------------------------------|
| SHELXT:  | G. M. Sheldrick, Acta Cryst. Sect. A, 2015, 71, 3–8. |
| SHELXL:  | G. M. Sheldrick, Acta Cryst. Sect. C, 2015, 71, 3–8. |
| PLATON:  | A. L. Spek, Acta Cryst. Sect. D, 2009, 65, 148–155.  |
| SQUEEZE: | A. L. Spek, Acta Cryst. Sect. C, 2015, 71, 9–18.     |
